# Supplementary material for: Metric-based vs peer-reviewed evaluation of a research output: Lesson learnt from UK’s national research assessment exercise
Source: PLoS One. 2017 Jul 11;12(7):e0179722. doi: 10.1371/journal.pone.0179722 (PMC5507403; doi:10.1371/journal.pone.0179722)
Supplement: S2 File — (XLSX) [file pone.0179722.s002.xlsx]

## Sheet: Sheet1
HEI	UoA	4*%	No of 4*	3*%	No of 3*	Weighting	Staff FTE	Total funding received for Outputs	3*£	4*£	£ a 3* can earn per year	£ a 4* can earn per year	No of papers to be submitted	No. of 4*	No. of 3*	Earning from 4*	Earning from 3*	Total Crosscheck
Cambridge	General engineering	37.4	66.2728	55.8	98.8776	363.969	177.2	5328295	14639.4	58557.7	3659.86	14639.4	708.8	265.091	395.51	3.88078e+06	1.44751e+06	5328295
Oxford	General engineering	39.5	37.0471	55.4	51.9597	200.148	93.79	2930050	14639.4	58557.7	3659.86	14639.4	375.16	148.188	207.839	2.16939e+06	760660	2.93005e+06
Imperial	General engineering	29	9.715	67	22.445	61.305	33.5	897470	14639.4	58557.7	3659.86	14639.4	134	38.86	89.78	568888	328582	897470
Northumbria	General engineering	18.2	4.186	60.6	13.938	30.682	23	449167	14639.4	58557.7	3659.86	14639.4	92	16.744	55.752	245123	204044	449167
Anglia Ruskin	General engineering	0	0	31	2.48	2.48	8	36306	14639.5	58558.1	3659.88	14639.5	32	0	9.92	0	36306	36306
Nottingham Trent	General engineering	26.8	3.8592	67.8	9.7632	25.2	14.4	368914	14639.4	58557.8	3659.86	14639.4	57.6	15.4368	39.0528	225986	142928	368914
University of Cambridge	Aeronautical, Mechanical, Chemical and Manufacturing Engineering	40	12.92	54.5	17.6035	69.2835	32.3	1014271	14639.4	58557.7	3659.86	14639.4	129.2	51.68	70.414	756566	257705	1.01427e+06
Cranfield University	Aeronautical, Mechanical, Chemical and Manufacturing Engineering	19.3	30.2431	63	98.721	219.693	156.7	3216186	14639.4	58557.7	3659.86	14639.4	626.8	120.972	394.884	1.77097e+06	1.44522e+06	3216186
Imperial College London	Aeronautical, Mechanical, Chemical and Manufacturing Engineering	27.8	48.0384	56.6	97.8048	289.958	172.8	4244825	14639.4	58557.7	3659.86	14639.4	691.2	192.154	391.219	2.81302e+06	1.43181e+06	4244825
University of Portsmouth	Aeronautical, Mechanical, Chemical and Manufacturing Engineering	2.3	0.414	59.1	10.638	12.294	18	179977	14639.4	58557.7	3659.85	14639.4	72	1.656	42.552	24242.9	155734	179977
University of Sunderland	Aeronautical, Mechanical, Chemical and Manufacturing Engineering	2.5	0.30625	35	4.2875	5.5125	12.25	80700	14639.5	58557.8	3659.86	14639.5	49	1.225	17.15	17933.3	62766.7	80700
University of Greenwich	Aeronautical, Mechanical, Chemical and Manufacturing Engineering	16.7	1.503	61.1	5.499	11.511	9	168514	14639.4	58557.6	3659.85	14639.4	36	6.012	21.996	88012	80502	168514
The University of Birmingham	Clinical Medicine	17	27.9055	55.7	91.4316	203.054	164.15	2664837	13123.8	52495.3	3280.95	13123.8	656.6	111.622	365.726	1.46491e+06	1.19993e+06	2664837
University of Bristol	Clinical Medicine	13.5	11.4008	56.7	47.8832	93.4862	84.45	1226895	13123.8	52495.3	3280.95	13123.8	337.8	45.603	191.533	598485	628410	1226895
University of Cambridge	Clinical Medicine	39.4	75.6677	45	86.4225	389.093	192.05	5106387	13123.8	52495.2	3280.95	13123.8	768.2	302.671	345.69	3.97219e+06	1.13419e+06	5106387
The University of East Anglia	Clinical Medicine	34.5	4.968	47.3	6.8112	26.6832	14.4	350185	13123.8	52495.2	3280.95	13123.8	57.6	19.872	27.2448	260796	89388.8	350185
University of Exeter	Clinical Medicine	35.6	8.722	41.1	10.0695	44.9575	24.5	590014	13123.8	52495.3	3280.95	13123.8	98	34.888	40.278	457864	132150	590014
Imperial College London	Clinical Medicine	26.9	89.8944	51.7	172.771	532.349	334.18	6986445	13123.8	52495.2	3280.95	13123.8	1336.72	359.578	691.084	4.71903e+06	2.26741e+06	6.98645e+06
The University of Birmingham	Public Health, Health Services and Primary Care	24.7	11.0409	50	22.35	66.5136	44.7	872912	13123.8	52495.2	3280.95	13123.8	178.8	44.1636	89.4	579595	293317	872912
University of Bristol	Public Health, Health Services and Primary Care	23.7	17.6802	55	41.03	111.751	74.6	1466597	13123.8	52495.3	3280.95	13123.8	298.4	70.7208	164.12	928127	538470	1466597
Brunel University London	Public Health, Health Services and Primary Care	9.5	0.9785	45.3	4.6659	8.5799	10.3	112601	13123.8	52495.3	3280.95	13123.8	41.2	3.914	18.6636	51366.6	61234.4	112601
University of Cambridge	Public Health, Health Services and Primary Care	45.8	26.1381	45.2	25.7956	130.348	57.07	1710661	13123.8	52495.2	3280.95	13123.8	228.28	104.552	103.183	1.37212e+06	338537	1710661
The University of East Anglia	Public Health, Health Services and Primary Care	17.9	2.506	58.9	8.246	18.27	14	239772	13123.8	52495.2	3280.95	13123.8	56	10.024	32.984	131553	108219	239772
University of Exeter	Public Health, Health Services and Primary Care	16.9	4.19965	59.5	14.7858	31.5844	24.85	414507	13123.8	52495.2	3280.95	13123.8	99.4	16.7986	59.143	220462	194045	414507
Anglia Ruskin University	Allied Health Professions, Dentistry, Nursing and Pharmacy	6.4	0.7232	68.1	7.6953	10.5881	11.3	138956	13123.8	52495.2	3280.95	13123.8	45.2	2.8928	30.7812	37964.5	100992	138956
Aston University	Allied Health Professions, Dentistry, Nursing and Pharmacy	32.4	18.4032	60.2	34.1936	107.806	56.8	1414831	13123.8	52495.3	3280.95	13123.8	227.2	73.6128	136.774	966081	448750	1.41483e+06
The University of Bath	Allied Health Professions, Dentistry, Nursing and Pharmacy	35.1	19.0242	53	28.726	104.823	54.2	1375675	13123.8	52495.3	3280.95	13123.8	216.8	76.0968	114.904	998680	376995	1375675
University of Bedfordshire	Allied Health Professions, Dentistry, Nursing and Pharmacy	21	5.229	51.4	12.7986	33.7146	24.9	442464	13123.8	52495.2	3280.95	13123.8	99.6	20.916	51.1944	274498	167966	442464
The University of Birmingham	Allied Health Professions, Dentistry, Nursing and Pharmacy	19.7	3.1323	78.8	12.5292	25.0584	15.9	328862	13123.8	52495.3	3280.96	13123.8	63.6	12.5292	50.1168	164431	164431	328862
Birmingham City University	Allied Health Professions, Dentistry, Nursing and Pharmacy	2	0.242	53.1	6.4251	7.3931	12.1	97026	13123.9	52495.4	3280.96	13123.9	48.4	0.968	25.7004	12703.9	84322.1	97026
Anglia Ruskin University	Psychology, Psychiatry and Neuroscience	10.3	1.4111	61.5	8.4255	14.0699	13.7	127948	9093.74	36375	2273.43	9093.74	54.8	5.6444	33.702	51328.7	76619.3	127948
Birkbeck College	Psychology, Psychiatry and Neuroscience	38.5	10.9148	45.1	12.7859	56.4449	28.35	513296	9093.76	36375	2273.44	9093.76	113.4	43.659	51.1434	397025	116271	513296
The University of Birmingham	Psychology, Psychiatry and Neuroscience	36.6	14.9328	45.8	18.6864	78.4176	40.8	713112	9093.77	36375.1	2273.44	9093.77	163.2	59.7312	74.7456	543182	169930	713112
The University of Bolton	Psychology, Psychiatry and Neuroscience	4.2	0.2226	25	1.325	2.2154	5.3	20146	9093.62	36374.5	2273.4	9093.62	21.2	0.8904	5.3	8096.96	12049	20146
University of Oxford	Psychology, Psychiatry and Neuroscience	54	53.082	38.8	38.1404	250.468	98.3	2277702	9093.77	36375.1	2273.44	9093.77	393.2	212.328	152.562	1.93086e+06	346840	2277702
Oxford Brookes University	Psychology, Psychiatry and Neuroscience	12.2	1.7934	31.7	4.6599	11.8335	14.7	107611	9093.76	36375	2273.44	9093.76	58.8	7.1736	18.6396	65235	42376	107611
The University of Bath	Biological Sciences	31.3	7.6685	51.8	12.691	43.365	24.5	569114	13123.8	52495.2	3280.95	13123.8	98	30.674	50.764	402560	166554	569114
Birkbeck College*	Biological Sciences	36.8	7.8016	40.9	8.6708	39.8772	21.2	523341	13123.8	52495.3	3280.95	13123.8	84.8	31.2064	34.6832	409547	113794	523341
The University of Birmingham	Biological Sciences	35	14.98	59.3	25.3804	85.3004	42.8	1119466	13123.8	52495.2	3280.95	13123.8	171.2	59.92	101.522	786379	333087	1119466
University of Bristol	Biological Sciences	26.1	16.8606	52.6	33.9796	101.422	64.6	1331043	13123.8	52495.2	3280.95	13123.8	258.4	67.4424	135.918	885101	445942	1331043
University of Cambridge	Biological Sciences	36.1	68.4564	46	87.2298	361.056	189.63	4738425	13123.8	52495.3	3280.95	13123.8	758.52	273.826	348.919	3.59364e+06	1.14479e+06	4738425
University of Derby	Biological Sciences	0	0	13.3	1.596	1.596	12	20946	13124.1	52496.2	3281.02	13124.1	48	0	6.384	0	20946	20946
University of Bristol	Agriculture, Veterinary and Food Science	23.7	8.06511	58	19.7374	51.9978	34.03	682410	13123.8	52495.3	3280.95	13123.8	136.12	32.2604	78.9496	423380	259030	682410
University of Cambridge	Agriculture, Veterinary and Food Science	26.1	10.3356	47.8	18.9288	60.2712	39.6	790988	13123.8	52495.3	3280.95	13123.8	158.4	41.3424	75.7152	542570	248418	790988
Canterbury Christ Church University	Agriculture, Veterinary and Food Science	2.8	0.35	47.2	5.9	7.3	12.5	95804	13123.8	52495.3	3280.96	13123.8	50	1.4	23.6	18373.4	77430.6	95804
Cranfield University	Agriculture, Veterinary and Food Science	4.8	1.2624	51.9	13.6497	18.6993	26.3	245406	13123.8	52495.2	3280.95	13123.8	105.2	5.0496	54.5988	66270	179136	245406
The University of East Anglia	Agriculture, Veterinary and Food Science	19.5	2.145	63.4	6.974	15.554	11	204128	13123.8	52495.3	3280.96	13123.8	44	8.58	27.896	112602	91525.6	204128
University of Greenwich	Agriculture, Veterinary and Food Science	5.1	1.1985	34.7	8.1545	12.9485	23.5	169934	13123.8	52495.3	3280.96	13123.8	94	4.794	32.618	62915.7	107018	169934
Birkbeck College	Earth Systems and Environmental Sciences	22.8	2.052	67.3	6.057	14.265	9	208831	14639.4	58557.6	3659.85	14639.4	36	8.208	24.228	120160	88670.8	208831
The University of Birmingham	Earth Systems and Environmental Sciences	17	4.794	72.6	20.4732	39.6492	28.2	580442	14639.4	58557.8	3659.86	14639.4	112.8	19.176	81.8928	280726	299716	580442
University of Brighton	Earth Systems and Environmental Sciences	0	0	45.8	6.5265	6.5265	14.25	95544	14639.4	58557.6	3659.85	14639.4	57	0	26.106	0	95544	95544
University of Bristol	Earth Systems and Environmental Sciences	31	13.7268	65.8	29.1362	84.0434	44.28	1230348	14639.4	58557.7	3659.86	14639.4	177.12	54.9072	116.545	803810	426538	1230348
Brunel University London	Earth Systems and Environmental Sciences	3.1	0.5022	58.4	9.4608	11.4696	16.2	167908	14639.4	58557.6	3659.85	14639.4	64.8	2.0088	37.8432	29407.6	138500	167908
University of Cambridge	Earth Systems and Environmental Sciences	31.2	13.2756	60.3	25.6576	78.76	42.55	1153002	14639.4	58557.7	3659.86	14639.4	170.2	53.1024	102.631	777389	375613	1153002
The University of Bath	Chemistry	18.9	6.2559	78.6	26.0166	51.0402	33.1	747199	14639.4	58557.7	3659.86	14639.4	132.4	25.0236	104.066	366331	380868	747199
The University of Birmingham	Chemistry	13.8	3.864	81.6	22.848	38.304	28	560749	14639.4	58557.7	3659.86	14639.4	112	15.456	91.392	226267	334482	560749
University of Bristol	Chemistry	28	16.408	69.5	40.727	106.359	58.6	1557035	14639.4	58557.7	3659.86	14639.4	234.4	65.632	162.908	960815	596220	1557035
University of Cambridge	Chemistry	46.5	29.1555	49.6	31.0992	147.721	62.7	2162554	14639.4	58557.7	3659.86	14639.4	250.8	116.622	124.397	1.70728e+06	455275	2162554
University of Durham	Chemistry	23	9.384	71.1	29.0088	66.5448	40.8	974178	14639.4	58557.7	3659.86	14639.4	163.2	37.536	116.035	549506	424672	974178
The University of East Anglia	Chemistry	32.3	6.3308	64.6	12.6616	37.9848	19.6	556076	14639.4	58557.7	3659.86	14639.4	78.4	25.3232	50.6464	370717	185359	556076
The University of Bath	Physics	15.5	3.565	75	17.25	31.51	23	461288	14639.4	58557.7	3659.85	14639.4	92	14.26	69	208758	252530	461288
The University of Birmingham	Physics	22.9	8.931	67.5	26.325	62.049	39	908362	14639.4	58557.7	3659.86	14639.4	156	35.724	105.3	522979	385383	908362
University of Bristol	Physics	18.8	8.3002	62.9	27.7704	60.9712	44.15	892583	14639.4	58557.7	3659.86	14639.4	176.6	33.2008	111.081	486041	406542	892583
University of Cambridge	Physics	23.9	36.6387	65.6	100.565	247.12	153.3	3617690	14639.4	58557.7	3659.86	14639.4	613.2	146.555	402.259	2.14548e+06	1.47221e+06	3617690
University of Central Lancashire	Physics	9.5	1.98645	58.4	12.2114	20.1572	20.91	295090	14639.4	58557.6	3659.85	14639.4	83.64	7.9458	48.8458	116322	178768	295090
University of Durham	Physics	21.8	16.2519	72.4	53.9742	118.982	74.55	1741825	14639.4	58557.7	3659.86	14639.4	298.2	65.0076	215.897	951674	790151	1741825
University of Bristol	Mathematical Sciences	28.4	23.714	52.8	44.088	138.944	83.5	2034061	14639.4	58557.7	3659.86	14639.4	334	94.856	176.352	1.38864e+06	645423	2.03406e+06
Brunel University London	Mathematical Sciences	8	1.924	56	13.468	21.164	24.05	309829	14639.4	58557.7	3659.86	14639.4	96.2	7.696	53.872	112665	197164	309829
University of Cambridge	Mathematical Sciences	35.4	50.8946	56.1	80.655	284.233	143.77	4161013	14639.4	58557.7	3659.86	14639.4	575.08	203.578	322.62	2.98027e+06	1.18074e+06	4161013
University of Chester	Mathematical Sciences	3.6	0.243	21.4	1.4445	2.4165	6.75	35376	14639.4	58557.4	3659.84	14639.4	27	0.972	5.778	14229.5	21146.5	35376
The City University	Mathematical Sciences	17.1	2.74455	62.9	10.0955	21.0737	16.05	308506	14639.4	58557.7	3659.85	14639.4	64.2	10.9782	40.3818	160714	147792	308506
Coventry University	Mathematical Sciences	10.3	0.927	75.9	6.831	10.539	9	154285	14639.4	58557.7	3659.86	14639.4	36	3.708	27.324	54283	100002	154285
The University of Birmingham	Computer Science and Informatics	28.7	11.6522	49.6	20.1376	66.7464	40.6	977129	14639.4	58557.7	3659.86	14639.4	162.4	46.6088	80.5504	682326	294803	977129
Birmingham City University	Computer Science and Informatics	0	0	33.3	2.4642	2.4642	7.4	36074	14639.2	58556.9	3659.81	14639.2	29.6	0	9.8568	0	36074	36074
University of Brighton	Computer Science and Informatics	3.1	0.434	43.8	6.132	7.868	14	115183	14639.4	58557.7	3659.86	14639.4	56	1.736	24.528	25414	89769	115183
University of Bristol	Computer Science and Informatics	23.3	9.6928	57.2	23.7952	62.5664	41.6	915936	14639.4	58557.7	3659.86	14639.4	166.4	38.7712	95.1808	567588	348348	915936
Brunel University London	Computer Science and Informatics	23.1	7.0455	40.1	12.2305	40.4125	30.5	591616	14639.4	58557.7	3659.86	14639.4	122	28.182	48.922	412568	179048	591616
University of Cambridge	Computer Science and Informatics	37	20.202	46.7	25.4982	106.306	54.6	1556262	14639.4	58557.7	3659.86	14639.4	218.4	80.808	101.993	1.18298e+06	373279	1556262
Aston University	Electrical and Electronic Engineering, Metallurgy and Materials	16.9	4.056	54.2	13.008	29.232	24	427940	14639.4	58557.7	3659.86	14639.4	96	16.224	52.032	237510	190430	427940
The University of Bath	Electrical and Electronic Engineering, Metallurgy and Materials	13.5	2.7675	73	14.965	26.035	20.5	381138	14639.4	58557.8	3659.86	14639.4	82	11.07	59.86	162059	219079	381138
The University of Birmingham A	Electrical and Electronic Engineering, Metallurgy and Materials	12	3.144	66.7	17.4754	30.0514	26.2	439935	14639.4	58557.7	3659.85	14639.4	104.8	12.576	69.9016	184105	255830	439935
The University of Birmingham B	Electrical and Electronic Engineering, Metallurgy and Materials	19.2	5.5872	65.8	19.1478	41.4966	29.1	607486	14639.4	58557.7	3659.85	14639.4	116.4	22.3488	76.5912	327173	280313	607486
University of Cambridge	Electrical and Electronic Engineering, Metallurgy and Materials	58	19.4648	37.4	12.5514	90.4106	33.56	1323560	14639.4	58557.7	3659.86	14639.4	134.24	77.8592	50.2058	1.13981e+06	183746	1323560
University of Central Lancashire	Electrical and Electronic Engineering, Metallurgy and Materials	3.1	0.248	56.3	4.504	5.496	8	80458	14639.4	58557.5	3659.84	14639.4	32	0.992	18.016	14522.3	65935.7	80458
The University of Birmingham	Civil and Construction Engineering	6	1.086	59.7	10.8057	15.1497	18.1	221783	14639.4	58557.7	3659.86	14639.4	72.4	4.344	43.2228	63593.7	158189	221783
The University of Bradford	Civil and Construction Engineering	15	1.08	60	4.32	8.64	7.2	126485	14639.5	58557.9	3659.87	14639.5	28.8	4.32	17.28	63242.5	63242.5	126485
Imperial College London	Civil and Construction Engineering	32.1	18.1686	60.8	34.4128	107.087	56.6	1567695	14639.4	58557.7	3659.86	14639.4	226.4	72.6744	137.651	1.06391e+06	503784	1.5677e+06
The University of Leeds	Civil and Construction Engineering	21.9	9.77835	58.1	25.9416	65.055	44.65	952369	14639.4	58557.7	3659.86	14639.4	178.6	39.1134	103.767	572598	379771	952369
University College London	Civil and Construction Engineering	10.5	4.0005	43.6	16.6116	32.6136	38.1	477444	14639.4	58557.7	3659.85	14639.4	152.4	16.002	66.4464	234260	243184	477444
Loughborough University	Civil and Construction Engineering	6.5	2.0735	42.3	13.4937	21.7877	31.9	318959	14639.4	58557.6	3659.85	14639.4	127.6	8.294	53.9748	121419	197540	318959
Loughborough University	Architecture, Built Environment and Planning	29	9.338	50.8	16.3576	53.7096	32.2	559514	10417.4	41669.6	2604.35	10417.4	128.8	37.352	65.4304	389110	170404	559514
The University of Manchester	Architecture, Built Environment and Planning	24.6	4.3296	36.8	6.4768	23.7952	17.6	247884	10417.4	41669.6	2604.35	10417.4	70.4	17.3184	25.9072	180413	67471.4	247884
University of Newcastle Upon Tyne	Architecture, Built Environment and Planning	18.9	7.9002	57.8	24.1604	55.7612	41.8	580886	10417.4	41669.5	2604.35	10417.4	167.2	31.6008	96.6416	329198	251688	580886
University of Northumbria at Newcastle	Architecture, Built Environment and Planning	4.3	0.7826	46.4	8.4448	11.5752	18.2	120583	10417.4	41669.4	2604.34	10417.4	72.8	3.1304	33.7792	32610.5	87972.5	120583
The University of Nottingham	Architecture, Built Environment and Planning	7.3	1.752	41.5	9.96	16.968	24	176762	10417.4	41669.5	2604.34	10417.4	96	7.008	39.84	73005	103757	176762
Nottingham Trent University	Architecture, Built Environment and Planning	14.6	1.6352	29.3	3.2816	9.8224	11.2	102324	10417.4	41669.7	2604.35	10417.4	44.8	6.5408	13.1264	68138.2	34185.8	102324
University of Exeter B	Geography, Environmental Studies and Archaeology	15.9	1.7808	50	5.6	12.7232	11.2	144114	11326.9	45307.5	2831.72	11326.9	44.8	7.1232	22.4	80683.5	63430.5	144114
University of Gloucestershire	Geography, Environmental Studies and Archaeology	10.6	1.1766	34.1	3.7851	8.4915	11.1	96182	11326.9	45307.4	2831.71	11326.9	44.4	4.7064	15.1404	53308.7	42873.3	96182
The University of Hull	Geography, Environmental Studies and Archaeology	17	5.865	39.3	13.5585	37.0185	34.5	419304	11326.9	45307.5	2831.72	11326.9	138	23.46	54.234	265729	153575	419304
King's College London	Geography, Environmental Studies and Archaeology	22.6	7.8648	53.1	18.4788	49.938	34.8	565641	11326.9	45307.5	2831.72	11326.9	139.2	31.4592	73.9152	356334	209307	565641
Kingston University	Geography, Environmental Studies and Archaeology	12.5	1.25	31.3	3.13	8.13	10	92087	11326.8	45307.3	2831.7	11326.8	40	5	12.52	56634.1	35452.9	92087
The University of Leeds	Geography, Environmental Studies and Archaeology	24.2	11.8338	46.6	22.7874	70.1226	48.9	794270	11326.9	45307.5	2831.72	11326.9	195.6	47.3352	91.1496	536160	258110	794270
The University of Birmingham	Economics and Econometrics	7.6	1.8392	58.2	14.0844	21.4412	24.2	171816	8013.36	32053.4	2003.34	8013.36	96.8	7.3568	56.3376	58952.7	112863	171816
University of Bristol	Economics and Econometrics	22.2	4.1292	58.8	10.9368	27.4536	18.6	219996	8013.38	32053.5	2003.34	8013.38	74.4	16.5168	43.7472	132355	87640.7	219996
Brunel University London	Economics and Econometrics	2	0.524	22.5	5.895	7.991	26.2	64035	8013.39	32053.6	2003.35	8013.39	104.8	2.096	23.58	16796.1	47238.9	64035
University of Cambridge	Economics and Econometrics	54.5	14.715	39.4	10.638	69.498	27	556913	8013.37	32053.5	2003.34	8013.37	108	58.86	42.552	471667	85246.2	556913
The City University	Economics and Econometrics	16.7	2.2879	37	5.069	14.2206	13.7	113955	8013.37	32053.5	2003.34	8013.37	54.8	9.1516	20.276	73335.2	40619.8	113955
The University of East Anglia	Economics and Econometrics	20.4	2.856	71.4	9.996	21.42	14	171646	8013.35	32053.4	2003.34	8013.35	56	11.424	39.984	91544.5	80101.5	171646
University of Cambridge	Business and Management Studies	43.6	16.9604	39.4	15.3266	83.1682	38.9	666458	8013.38	32053.5	2003.34	8013.38	155.6	67.8416	61.3064	543640	122818	666458
University of Central Lancashire	Business and Management Studies	3.2	0.3664	30.1	3.44645	4.91205	11.45	39362	8013.35	32053.4	2003.34	8013.35	45.8	1.4656	13.7858	11744.4	27617.6	39362
University of Chester	Business and Management Studies	4.3	0.258	4.4	0.264	1.296	6	10385	8013.12	32052.5	2003.28	8013.12	24	1.032	1.056	8269.54	2115.46	10385
The City University	Business and Management Studies	36.6	28.6541	45.6	35.7002	150.317	78.29	1204544	8013.37	32053.5	2003.34	8013.37	313.16	114.617	142.801	918465	286079	1204544
Coventry University	Business and Management Studies	4.5	0.765	27.3	4.641	7.701	17	61711	8013.37	32053.5	2003.34	8013.37	68	3.06	18.564	24520.9	37190.1	61711
Cranfield University	Business and Management Studies	14.3	5.83583	50.6	20.6499	43.9932	40.81	352534	8013.38	32053.5	2003.34	8013.38	163.24	23.3433	82.5994	187059	165475	352534
University of Sussex	Law	8.1	2.511	48.9	15.159	25.203	31	201961	8013.37	32053.5	2003.34	8013.37	124	10.044	60.636	80486.3	121475	201961
The University of Warwick	Law	28.8	8.928	53.4	16.554	52.266	31	418827	8013.37	32053.5	2003.34	8013.37	124	35.712	66.216	286174	132653	418827
University of the West of England, Bristol	Law	6.1	0.854	30.6	4.284	7.7	14	61703	8013.38	32053.5	2003.34	8013.38	56	3.416	17.136	27373.7	34329.3	61703
The University of Westminster	Law	7.5	1.4175	45	8.505	14.175	18.9	113590	8013.4	32053.6	2003.35	8013.4	75.6	5.67	34.02	45436	68154	113590
The University of Wolverhampton	Law	9.3	1.116	9.3	1.116	5.58	12	44715	8013.44	32053.8	2003.36	8013.44	48	4.464	4.464	35772	8943	44715
The University of York	Law	34.4	3.44	50	5	18.76	10	150331	8013.38	32053.5	2003.34	8013.38	40	13.76	20	110264	40066.9	150331
Birkbeck College	Politics and International Studies	25	3.2	43.2	5.5296	18.3296	12.8	146882	8013.38	32053.5	2003.34	8013.38	51.2	12.8	22.1184	102571	44310.8	146882
The University of Birmingham	Politics and International Studies	10.6	4.98942	39.1	18.4044	38.362	47.07	307409	8013.36	32053.4	2003.34	8013.36	188.28	19.9577	73.6175	159928	147481	307409
The University of Bradford	Politics and International Studies	6.4	0.8576	38.3	5.1322	8.5626	13.4	68615	8013.34	32053.3	2003.33	8013.34	53.6	3.4304	20.5288	27489	41126	68615
University of Bristol	Politics and International Studies	13.3	3.4314	36.7	9.4686	23.1942	25.8	185864	8013.38	32053.5	2003.35	8013.38	103.2	13.7256	37.8744	109988	75875.5	185864
Brunel University London	Politics and International Studies	20.3	4.8314	39.2	9.3296	28.6552	23.8	229625	8013.38	32053.5	2003.34	8013.38	95.2	19.3256	37.3184	154863	74761.6	229625
University of Cambridge	Politics and International Studies	28.7	8.4665	34.3	10.1185	43.9845	29.5	352464	8013.37	32053.5	2003.34	8013.37	118	33.866	40.474	271381	81083.3	352464
The University of Southampton	Social Work and Social Policy	30.3	12.423	55.2	22.632	72.324	41	579559	8013.37	32053.5	2003.34	8013.37	164	49.692	90.528	398200	181359	579559
University of Sunderland	Social Work and Social Policy	4.5	0.315	41	2.87	4.13	7	33095	8013.32	32053.3	2003.33	8013.32	28	1.26	11.48	10096.8	22998.2	33095
University of Sussex	Social Work and Social Policy	10.2	1.2648	40.8	5.0592	10.1184	12.4	81083	8013.42	32053.7	2003.36	8013.42	49.6	5.0592	20.2368	40541.5	40541.5	81083
Teesside University	Social Work and Social Policy	10	1.08	75	8.1	12.42	10.8	99526	8013.37	32053.5	2003.34	8013.37	43.2	4.32	32.4	34617.7	64908.3	99526
University of the West of England, Bristol	Social Work and Social Policy	7	1.386	30.2	5.9796	11.5236	19.8	92343	8013.38	32053.5	2003.35	8013.38	79.2	5.544	23.9184	44426.2	47916.8	92343
The University of York	Social Work and Social Policy	28.6	9.6096	51.4	17.2704	55.7088	33.6	446415	8013.37	32053.5	2003.34	8013.37	134.4	38.4384	69.0816	308021	138394	446415
University of Oxford	Sociology	23.3	7.65405	52.6	17.2791	47.8953	32.85	383803	8013.38	32053.5	2003.34	8013.38	131.4	30.6162	69.1164	245339	138464	383803
Roehampton University	Sociology	16.3	1.86635	30.2	3.4579	10.9233	11.45	87532	8013.33	32053.3	2003.33	8013.33	45.8	7.4654	13.8316	59822.7	27709.3	87532
The University of Surrey	Sociology	17.1	3.2832	60	11.52	24.6528	19.2	197552	8013.37	32053.5	2003.34	8013.37	76.8	13.1328	46.08	105238	92314	197552
University of Sussex	Sociology	10.3	1.6789	50	8.15	14.8656	16.3	119124	8013.4	32053.6	2003.35	8013.4	65.2	6.7156	32.6	53814.8	65309.2	119124
The University of Warwick	Sociology	18.2	6.2972	39.5	13.667	38.8558	34.6	311366	8013.37	32053.5	2003.34	8013.37	138.4	25.1888	54.668	201847	109519	311366
University of Winchester	Sociology	0	0	29.6	2.072	2.072	7	16604	8013.51	32054.1	2003.38	8013.51	28	0	8.288	0	16604	16604
Brunel University London	Anthropology and Development Studies	14.7	1.323	50	4.5	9.792	9	78467	8013.38	32053.5	2003.34	8013.38	36	5.292	18	42406.8	36060.2	78467
University of Cambridge	Anthropology and Development Studies	22	7.8936	36.9	13.2397	44.8141	35.88	359112	8013.37	32053.5	2003.34	8013.37	143.52	31.5744	52.9589	253017	106095	359112
University of Durham	Anthropology and Development Studies	27.4	6.7815	32.6	8.0685	35.1945	24.75	282027	8013.38	32053.5	2003.35	8013.38	99	27.126	32.274	217371	64656	282027
The University of East Anglia	Anthropology and Development Studies	23	5.474	41	9.758	31.654	23.8	253655	8013.36	32053.5	2003.34	8013.36	95.2	21.896	39.032	175461	78194.4	253655
Goldsmiths' College	Anthropology and Development Studies	17.9	2.2375	43.6	5.45	14.4	12.5	115393	8013.4	32053.6	2003.35	8013.4	50	8.95	21.8	71720	43673	115393
University of Greenwich	Anthropology and Development Studies	0	0	27.8	2.4186	2.4186	8.7	19381	8013.31	32053.3	2003.33	8013.31	34.8	0	9.6744	0	19381	19381
University of the West of England, Bristol	Education	18.6	1.8972	34.9	3.5598	11.1486	10.2	89338	8013.38	32053.5	2003.35	8013.38	40.8	7.5888	14.2392	60812	28526	89338
University of Winchester	Education	18.9	1.34757	40.6	2.89478	8.28506	7.13	66391	8013.34	32053.4	2003.33	8013.34	28.52	5.39028	11.5791	43194.1	23196.9	66391
The University of Wolverhampton	Education	7.1	0.6532	42.9	3.9468	6.5596	9.2	52565	8013.45	32053.8	2003.36	8013.45	36.8	2.6128	15.7872	20937.5	31627.5	52565
University of Worcester	Education	11.5	1.6445	21.2	3.0316	9.6096	14.3	77005	8013.34	32053.4	2003.34	8013.34	57.2	6.578	12.1264	52711.8	24293.2	77005
The University of York	Education	27.6	6.1548	43.7	9.7451	34.3643	22.3	275374	8013.37	32053.5	2003.34	8013.37	89.2	24.6192	38.9804	197283	78091.1	275374
York St John University	Education	5	0.47	15	1.41	3.29	9.4	26364	8013.37	32053.5	2003.34	8013.37	37.6	1.88	5.64	15065.1	11298.9	26364
The University of Bath	Sport and Exercise Sciences, Leisure and Tourism	35.7	7.854	48.6	10.692	42.108	22	438655	10417.4	41669.5	2604.34	10417.4	88	31.416	42.768	327272	111383	438655
University of Bedfordshire	Sport and Exercise Sciences, Leisure and Tourism	14.5	2.813	33.3	6.4602	17.7122	19.4	184515	10417.4	41669.6	2604.35	10417.4	77.6	11.252	25.8408	117217	67298.5	184515
The University of Birmingham	Sport and Exercise Sciences, Leisure and Tourism	43.2	14.8608	40.7	14.0008	73.444	34.4	765094	10417.4	41669.5	2604.34	10417.4	137.6	59.4432	56.0032	619242	145852	765094
Bournemouth University	Sport and Exercise Sciences, Leisure and Tourism	17.8	2.492	64.4	9.016	18.984	14	197764	10417.4	41669.6	2604.35	10417.4	56	9.968	36.064	103841	93923.3	197764
University of Brighton	Sport and Exercise Sciences, Leisure and Tourism	22	4.7102	43.9	9.39899	28.2398	21.41	294185	10417.4	41669.6	2604.35	10417.4	85.64	18.8408	37.596	196272	97913	294185
University of Bristol	Sport and Exercise Sciences, Leisure and Tourism	52.9	3.703	47.1	3.297	18.109	7	188648	10417.4	41669.4	2604.34	10417.4	28	14.812	13.188	154302	34346	188648
The University of Birmingham	Area Studies	38.5	2.926	50	3.8	15.504	7.6	116357	7504.97	30019.9	1876.24	7504.97	30.4	11.704	15.2	87838.1	28518.9	116357
University of Cambridge	Area Studies	28.3	9.056	38.1	12.192	48.416	32	363360	7504.96	30019.8	1876.24	7504.96	128	36.224	48.768	271860	91500.4	363360
University of Chester	Area Studies	13.3	1.0906	20	1.64	6.0024	8.2	45048	7505	30020	1876.25	7505	32.8	4.3624	6.56	32739.8	12308.2	45048
The University of East Anglia	Area Studies	30	4.2	32.5	4.55	21.35	14	160231	7504.96	30019.9	1876.24	7504.96	56	16.8	18.2	126083	34147.6	160231
University of Exeter	Area Studies	26.7	3.88218	44.4	6.45576	21.9845	14.54	164993	7504.98	30019.9	1876.24	7504.98	58.16	15.5287	25.823	116543	48450.3	164993
University College London	Area Studies	24.3	9.56448	25.7	10.1155	48.3734	39.36	363041	7504.97	30019.9	1876.24	7504.97	157.44	38.2579	40.4621	287124	75916.6	363041
Aston University	Modern Languages and Linguistics	4.6	0.851	44.6	8.251	11.655	18.5	87470	7504.93	30019.7	1876.23	7504.93	74	3.404	33.004	25546.8	61923.2	87470
Birkbeck College	Modern Languages and Linguistics	20.4	5.1918	41.7	10.6127	31.3798	25.45	235504	7504.94	30019.8	1876.24	7504.94	101.8	20.7672	42.4506	155857	79647.3	235504
The University of Birmingham	Modern Languages and Linguistics	21.7	7.1827	50.4	16.6824	45.4132	33.1	340824	7504.95	30019.8	1876.24	7504.95	132.4	28.7308	66.7296	215623	125201	340824
University of Bristol	Modern Languages and Linguistics	23.9	7.4329	44.9	13.9639	43.6955	31.1	327933	7504.96	30019.8	1876.24	7504.96	124.4	29.7316	55.8556	223134	104799	327933
University of Cambridge	Modern Languages and Linguistics	34.9	33.689	42.3	40.8322	175.588	96.53	1317781	7504.96	30019.8	1876.24	7504.96	386.12	134.756	163.329	1.01134e+06	306444	1317781
University of Central Lancashire	Modern Languages and Linguistics	25	2.65	45	4.77	15.37	10.6	115351	7504.94	30019.8	1876.24	7504.94	42.4	10.6	19.08	79552.4	35798.6	115351
Anglia Ruskin University	English Language and Literature	13	2.184	42.6	7.1568	15.8928	16.8	119275	7504.97	30019.9	1876.24	7504.97	67.2	8.736	28.6272	65563.4	53711.6	119275
Bath Spa University	English Language and Literature	22.9	4.82045	46.8	9.8514	29.1332	21.05	218643	7504.94	30019.8	1876.24	7504.94	84.2	19.2818	39.4056	144709	73934.2	218643
University of Bedfordshire	English Language and Literature	33.3	2.997	33.4	3.006	14.994	9	112529	7504.94	30019.7	1876.23	7504.94	36	11.988	12.024	89969.2	22559.8	112529
Birkbeck College	English Language and Literature	23.2	7.8184	47.5	16.0075	47.2811	33.7	354843	7504.96	30019.9	1876.24	7504.96	134.8	31.2736	64.03	234707	120136	354843
The University of Birmingham	English Language and Literature	32.5	12.09	47.2	17.5584	65.9184	37.2	494715	7504.96	30019.8	1876.24	7504.96	148.8	48.36	70.2336	362940	131775	494715
Birmingham City University	English Language and Literature	26.3	3.2612	50	6.2	19.2448	12.4	144431	7504.94	30019.7	1876.23	7504.94	49.6	13.0448	24.8	97900.4	46530.6	144431
University of the West of England, Bristol	History	1.8	0.2376	52.7	6.9564	7.9068	13.2	59340	7504.93	30019.7	1876.23	7504.93	52.8	0.9504	27.8256	7132.69	52207.3	59340
The University of Westminster	History	19	0.95	38.1	1.905	5.705	5	42816	7505	30020	1876.25	7505	20	3.8	7.62	28519	14297	42816
University of Winchester	History	15.4	1.694	41	4.51	11.286	11	84701	7504.96	30019.8	1876.24	7504.96	44	6.776	18.04	50853.6	33847.4	84701
The University of Wolverhampton	History	10.9	1.4279	38.2	5.0042	10.7158	13.1	80422	7504.99	30020	1876.25	7504.99	52.4	5.7116	20.0168	42865.5	37556.5	80422
University of Worcester	History	20	1	30	1.5	5.5	5	41277	7504.91	30019.6	1876.23	7504.91	20	4	6	30019.6	11257.4	41277
The University of York	History	35.6	12.282	47	16.215	65.343	34.5	490396	7504.95	30019.8	1876.24	7504.95	138	49.128	64.86	368703	121693	490396
The University of Birmingham	Classics	32.9	6.58	40.8	8.16	34.48	20	258771	7504.96	30019.8	1876.24	7504.96	80	26.32	32.64	197531	61240.5	258771
University of Bristol	Classics	32	4.8	40	6	25.2	15	189125	7504.96	30019.8	1876.24	7504.96	60	19.2	24	144095	45029.8	189125
University of Cambridge	Classics	38.8	14.938	43.9	16.9015	76.6535	38.5	575281	7504.95	30019.8	1876.24	7504.95	154	59.752	67.606	448436	126845	575281
University of Durham	Classics	35.3	5.0126	43.1	6.1202	26.1706	14.2	196409	7504.95	30019.8	1876.24	7504.95	56.8	20.0504	24.4808	150477	45931.8	196409
University of Exeter	Classics	22.1	4.199	44.1	8.379	25.175	19	188937	7504.95	30019.8	1876.24	7504.95	76	16.796	33.516	126053	62883.9	188937
The University of Kent	Classics	16.7	2.0708	39.6	4.9104	13.1936	12.4	99017	7504.93	30019.7	1876.23	7504.93	49.6	8.2832	19.6416	62164.8	36852.2	99017
The University of Southampton	Philosophy	25.7	3.084	57.2	6.864	19.2	12	144095	7504.95	30019.8	1876.24	7504.95	48	12.336	27.456	92581	51514	144095
St Mary's University, Twickenham	Philosophy	0	0	6.7	0.3216	0.3216	4.8	2414	7506.22	30024.9	1876.55	7506.22	19.2	0	1.2864	0	2414	2414
University of Sussex	Philosophy	33.3	3.4965	39.4	4.137	18.123	10.5	136012	7504.94	30019.8	1876.23	7504.94	42	13.986	16.548	104964	31047.9	136012
The University of Warwick	Philosophy	37.8	7.182	55.4	10.526	39.254	19	294600	7504.97	30019.9	1876.24	7504.97	76	28.728	42.104	215603	78997.3	294600
University of the West of England, Bristol	Philosophy	5	0.3	35	2.1	3.3	6	24766	7504.85	30019.4	1876.21	7504.85	24	1.2	8.4	9005.82	15760.2	24766
The University of York	Philosophy	17.2	3.1476	54.7	10.0101	22.6005	18.3	169616	7504.97	30019.9	1876.24	7504.97	73.2	12.5904	40.0404	94490.5	75125.5	169616
The University of Birmingham	Theology and Religious Studies	52.9	4.761	14.7	1.323	20.367	9	152853	7504.93	30019.7	1876.23	7504.93	36	19.044	5.292	142924	9929.03	152853
University of Bristol	Theology and Religious Studies	28.1	2.4166	37.5	3.225	12.8914	8.6	96749	7504.93	30019.7	1876.23	7504.93	34.4	9.6664	12.9	72545.6	24203.4	96749
University of Cambridge	Theology and Religious Studies	20.4	4.9776	49.5	12.078	31.9884	24.4	240072	7504.97	30019.9	1876.24	7504.97	97.6	19.9104	48.312	149427	90645	240072
Canterbury Christ Church University	Theology and Religious Studies	9.1	0.546	45.4	2.724	4.908	6	36834	7504.89	30019.6	1876.22	7504.89	24	2.184	10.896	16390.7	20443.3	36834
University of Chester	Theology and Religious Studies	12.5	1.3875	27.1	3.0081	8.5581	11.1	64228	7504.94	30019.7	1876.23	7504.94	44.4	5.55	12.0324	41652.4	22575.6	64228
University of Durham	Theology and Religious Studies	34.8	8.6304	42.4	10.5152	45.0368	24.8	337999	7504.95	30019.8	1876.24	7504.95	99.2	34.5216	42.0608	259083	78916.1	337999
Anglia Ruskin University	Art and Design: History, Practice and Theory	5.7	0.7923	43.4	6.0326	9.2018	13.9	89777	9756.46	39025.8	2439.12	9756.46	55.6	3.1692	24.1304	30920.2	58856.8	89777
The Arts University Bournemouth	Art and Design: History, Practice and Theory	11.5	1.3915	40.4	4.8884	10.4544	12.1	101998	9756.47	39025.9	2439.12	9756.47	48.4	5.566	19.5536	54304.5	47693.5	101998
University of the Arts, London	Art and Design: History, Practice and Theory	26.5	29.0705	49.5	54.3015	170.584	109.7	1664289	9756.45	39025.8	2439.11	9756.45	438.8	116.282	217.206	1.1345e+06	529790	1.66429e+06
Bath Spa University	Art and Design: History, Practice and Theory	18.4	2.60728	40.8	5.78136	16.2105	14.17	158157	9756.47	39025.9	2439.12	9756.47	56.68	10.4291	23.1254	101751	56405.6	158157
Birkbeck College	Art and Design: History, Practice and Theory	12.8	2.78912	42.3	9.21717	20.3736	21.79	198774	9756.43	39025.7	2439.11	9756.43	87.16	11.1565	36.8687	108847	89926.6	198774
The University of Birmingham	Art and Design: History, Practice and Theory	33.3	2.0646	41.7	2.5854	10.8438	6.2	105797	9756.45	39025.8	2439.11	9756.45	24.8	8.2584	10.3416	80572.7	25224.3	105797
The University of West London	Music, Drama, Dance and Performing Arts	10	0.45	30	1.35	3.15	4.5	30733	9756.51	39026	2439.13	9756.51	18	1.8	5.4	17561.7	13171.3	30733
University of Winchester	Music, Drama, Dance and Performing Arts	13.2	1.6368	30.2	3.7448	10.292	12.4	100413	9756.41	39025.7	2439.1	9756.41	49.6	6.5472	14.9792	63877.2	36535.8	100413
University of Worcester	Music, Drama, Dance and Performing Arts	0	0	41.7	1.8348	1.8348	4.4	17901	9756.38	39025.5	2439.09	9756.38	17.6	0	7.3392	0	17901	17901
The University of York A	Music, Drama, Dance and Performing Arts	28.8	3.744	42.4	5.512	20.488	13	199890	9756.44	39025.8	2439.11	9756.44	52	14.976	22.048	146112	53777.5	199890
The University of York B	Music, Drama, Dance and Performing Arts	15.2	2.204	65.2	9.454	18.27	14.5	178250	9756.43	39025.7	2439.11	9756.43	58	8.816	37.816	86012.7	92237.3	178250
York St John University	Music, Drama, Dance and Performing Arts	7.9	0.8058	23.7	2.4174	5.6406	10.2	55032	9756.41	39025.6	2439.1	9756.41	40.8	3.2232	9.6696	31446.9	23585.1	55032
Anglia Ruskin University	Communication, Cultural and Media Studies, Library and Information Management	18.2	1.5834	51.5	4.4805	10.8141	8.7	81159	7504.92	30019.7	1876.23	7504.92	34.8	6.3336	17.922	47533.2	33625.8	81159
Bath Spa University	Communication, Cultural and Media Studies, Library and Information Management	19.4	1.4356	38.7	2.8638	8.6062	7.4	64589	7504.94	30019.8	1876.23	7504.94	29.6	5.7424	11.4552	43096.4	21492.6	64589
University of Bedfordshire	Communication, Cultural and Media Studies, Library and Information Management	14.3	1.6445	38.1	4.3815	10.9595	11.5	82251	7505	30020	1876.25	7505	46	6.578	17.526	49367.9	32883.1	82251
Birmingham City University	Communication, Cultural and Media Studies, Library and Information Management	13.3	1.49093	40	4.484	10.4477	11.21	78410	7504.99	30019.9	1876.25	7504.99	44.84	5.96372	17.936	44757.6	33652.4	78410
The University of Bolton	Communication, Cultural and Media Studies, Library and Information Management	2.9	0.2262	20.6	1.6068	2.5116	7.8	18849	7504.78	30019.1	1876.19	7504.78	31.2	0.9048	6.4272	6790.32	12058.7	18849
Bournemouth University	Communication, Cultural and Media Studies, Library and Information Management	22.4	5.5552	47	11.656	33.8768	24.8	254244	7504.96	30019.8	1876.24	7504.96	99.2	22.2208	46.624	166766	87477.8	254244
